# Supplementary material
Source: PubMed Central journal article supplement (PMC3269287)
Supplement: SD1.pdf [file SD1.pdf]

SUPPLEMENTARY TECHNICAL APPENDIX

**Predictors of *I. scapularis* nymphal density.** In a previous model,<sup>1</sup> we assessed a large number of variables, including long-term climate data series from weather station data (NASA Terrestrial Observation and Prediction System<sup>2</sup>); remotely sensed climate and vegetation index data derived from the Advanced Very High Resolution Radiometer (AVHRR) (National Oceanographic and Atmospheric Administration and the Trypanosomiasis and Land-use in Africa Research Group of the University of Oxford<sup>3</sup>); elevation (Earth Resource Data Analysis System, Atlanta, GA); and soil tex-

ture data from the U.S. General Soil Map database.<sup>4</sup> The long-term climate data derived from weather stations and remote sensing were subjected to a temporal Fourier analysis (TFA) to remove noise from the seasonal data, achieve data reduction, and produce a set of uncorrelated outputs while retaining a description of seasonality.<sup>5</sup> Outcomes of the TFA included the detrended annual amplitude and phase of the maximum and minimum monthly temperature, precipitation, channel 3 middle infrared, land surface temperature, and normalized difference vegetation index. Amplitude is the maximum variation of the cycle around the mean and phase is its timing.

SUPPLEMENTARY TABLE 1  
List of sites where a minimum of one *I. scapularis* nymph were collected

| Site                               | State | Year | N*  | Prevalence† | DON‡  | DIN§  |
|------------------------------------|-------|------|-----|-------------|-------|-------|
| Oak Mountain State Park            | AL    | 2004 | 1   | 0.00        | 0.05  | 0.00  |
| Devils Hopyard State Park          | CT    | 2005 | 159 | 0.14        | 44.17 | 6.11  |
| Mount Riga State Park              | CT    | 2006 | 122 | 0.22        | 20.13 | 4.46  |
| Fort McAllister State Park         | GA    | 2004 | 1   | 0.00        | 0.08  | 0.00  |
| Brushy Creek State Recreation Area | IA    | 2004 | 2   | 0.00        | 0.45  | 0.00  |
| Pikes Peak State Park              | IA    | 2005 | 1   | 0.00        | 0.23  | 0.00  |
| Volga River State Recreation Area  | IA    | 2006 | 1   | 0.00        | 0.25  | 0.00  |
| Big River State Forest             | IL    | 2005 | 10  | 0.00        | 2.72  | 0.00  |
| Castle Rock State Park             | IL    | 2005 | 88  | 0.14        | 20.28 | 2.77  |
| Kankakee River State Park          | IL    | 2006 | 1   | 0.00        | 0.23  | 0.00  |
| Kickapoo State Park                | IL    | 2005 | 24  | 0.04        | 6.05  | 0.25  |
| Lincoln Trail State Park           | IL    | 2004 | 4   | 0.00        | 1.25  | 0.00  |
| Moraine View State Park            | IL    | 2006 | 1   | 0.00        | 0.29  | 0.00  |
| Natural Lands CA                   | IL    | 2004 | 41  | 0.15        | 14.91 | 2.18  |
| Natural Lands CA                   | IL    | 2006 | 13  | 0.08        | 4.64  | 0.36  |
| Palos Preserve                     | IL    | 2005 | 21  | 0.00        | 5.29  | 0.00  |
| Pere Marquette State Park          | IL    | 2006 | 1   | 0.00        | 0.17  | 0.00  |
| Red Hills State Park               | IL    | 2005 | 16  | 0.00        | 4.54  | 0.00  |
| Wolf Creek State Park              | IL    | 2005 | 6   | 0.17        | 1.44  | 0.24  |
| Tippecanoe River State Park        | IN    | 2004 | 41  | 0.15        | 6.52  | 0.95  |
| Turkey Run State Park              | IN    | 2005 | 13  | 0.00        | 3.44  | 0.00  |
| Willow Slough SFWA                 | IN    | 2004 | 13  | 0.08        | 5.71  | 0.44  |
| Diamond Hill State Park            | MA    | 2006 | 2   | 0.00        | 0.33  | 0.00  |
| Moore State Park                   | MA    | 2006 | 78  | 0.17        | 15.40 | 2.57  |
| Moore State Park                   | MA    | 2004 | 42  | 0.05        | 6.63  | 0.32  |
| Moore State Park                   | MA    | 2005 | 16  | 0.13        | 4.61  | 0.58  |
| Elk Neck State Park                | MD    | 2006 | 227 | 0.22        | 31.58 | 6.82  |
| Elk Neck State Park                | MD    | 2004 | 153 | 0.15        | 26.79 | 4.03  |
| Elk Neck State Park                | MD    | 2005 | 59  | 0.07        | 15.06 | 1.02  |
| Pocomoke State Park                | MD    | 2005 | 5   | 0.00        | 0.66  | 0.00  |
| Rocky Gorge Reservoir              | MD    | 2006 | 4   | 0.50        | 0.73  | 0.37  |
| St. Marys State Park               | MD    | 2006 | 10  | 0.60        | 2.60  | 1.56  |
| Acadia National Park               | ME    | 2006 | 43  | 0.23        | 7.88  | 1.83  |
| Bradbury Mountain State Park       | ME    | 2006 | 14  | 0.21        | 2.17  | 0.47  |
| Crescent Beach State Park          | ME    | 2004 | 145 | 0.50        | 30.09 | 14.94 |
| Porcupine Mountains State Park     | MI    | 2005 | 1   | 0.00        | 0.19  | 0.00  |
| Shakey Lakes                       | MI    | 2005 | 7   | 0.00        | 1.42  | 0.00  |
| Shakey Lakes                       | MI    | 2006 | 6   | 0.33        | 1.48  | 0.49  |
| Shakey Lakes                       | MI    | 2004 | 5   | 0.00        | 2.44  | 0.00  |
| Van Buren State Park               | MI    | 2005 | 157 | 0.13        | 34.92 | 4.45  |
| Warren Woods State Park            | MI    | 2005 | 2   | 0.00        | 0.24  | 0.00  |
| Banning State Park                 | MN    | 2005 | 47  | 0.43        | 8.15  | 3.47  |
| Banning State Park                 | MN    | 2006 | 21  | 0.14        | 6.29  | 0.90  |
| Foothills State Forest             | MN    | 2004 | 126 | 0.37        | 28.03 | 10.46 |
| Itasca State Park                  | MN    | 2006 | 6   | 0.17        | 1.87  | 0.31  |

(continued)

SUPPLEMENTARY TABLE 1

Continued

| Site                                   | State | Year | N*  | Prevalence† | DON‡   | DIN§  |
|----------------------------------------|-------|------|-----|-------------|--------|-------|
| Jay Cooke State Park                   | MN    | 2004 | 15  | 0.20        | 2.98   | 0.60  |
| Paul Bunyan State Forest               | MN    | 2004 | 129 | 0.33        | 25.24  | 8.41  |
| Sand Dunes State Forest                | MN    | 2005 | 9   | 0.44        | 2.24   | 1.00  |
| Sand Dunes State Forest                | MN    | 2004 | 1   | 0.00        | 0.02   | 0.00  |
| Sibley State Park                      | MN    | 2004 | 5   | 0.20        | 1.10   | 0.22  |
| White Earth State Forest               | MN    | 2005 | 1   | 1.00        | 0.14   | 0.14  |
| Knob Noster State Park                 | MO    | 2004 | 1   | 0.00        | 0.78   | 0.00  |
| Lake of the Ozarks State Park          | MO    | 2005 | 1   | 0.00        | 0.34   | 0.00  |
| Montauk State Park                     | MO    | 2004 | 1   | 0.00        | 0.18   | 0.00  |
| Croatan National Forest                | NC    | 2006 | 1   | 0.00        | 0.22   | 0.00  |
| Hofmann Forest                         | NC    | 2005 | 3   | 0.00        | 0.34   | 0.00  |
| Raven Rock State Park                  | NC    | 2006 | 1   | 0.00        | 0.11   | 0.00  |
| Bear Brook State Park                  | NH    | 2005 | 4   | 0.00        | 1.48   | 0.00  |
| Bear Brook State Park                  | NH    | 2006 | 4   | 0.00        | 0.68   | 0.00  |
| Allaire State Park                     | NJ    | 2005 | 74  | 0.14        | 20.42  | 2.76  |
| High Point State Park                  | NJ    | 2006 | 35  | 0.23        | 6.65   | 1.52  |
| Parvin State Park                      | NJ    | 2005 | 19  | 0.37        | 7.04   | 2.59  |
| Buttermilk Falls State Park            | NY    | 2005 | 6   | 0.00        | 1.88   | 0.00  |
| Cathedral County State Park            | NY    | 2006 | 57  | 0.25        | 13.13  | 3.22  |
| Cedar Point County Park                | NY    | 2006 | 71  | 0.31        | 17.23  | 5.34  |
| Connetquot River State Park            | NY    | 2005 | 419 | 0.21        | 84.54  | 17.35 |
| Fairhaven State Park                   | NY    | 2005 | 1   | 0.00        | 0.16   | 0.00  |
| Fordham University                     | NY    | 2006 | 400 | 0.21        | 63.09  | 13.25 |
| Fordham University                     | NY    | 2004 | 288 | 0.25        | 44.98  | 11.40 |
| Grafton Lakes State Park               | NY    | 2005 | 12  | 0.00        | 3.09   | 0.00  |
| Grafton Lakes State Park               | NY    | 2006 | 9   | 0.00        | 1.90   | 0.00  |
| Grafton Lakes State Park               | NY    | 2004 | 4   | 0.00        | 0.47   | 0.00  |
| Moreau Lake State Park                 | NY    | 2005 | 19  | 0.00        | 3.74   | 0.00  |
| Sunken Meadow State Park               | NY    | 2004 | 4   | 0.00        | 0.59   | 0.00  |
| Verona Beach State Park                | NY    | 2004 | 77  | 0.03        | 14.02  | 0.36  |
| Osage Hills State Park                 | OK    | 2004 | 4   | 0.00        | 0.63   | 0.00  |
| Pawnee Bill Ranch Site                 | OK    | 2004 | 1   | 0.00        | 0.13   | 0.00  |
| French Creek State Park                | PA    | 2005 | 32  | 0.09        | 8.98   | 0.84  |
| Gifford Pinchot State Park             | PA    | 2005 | 61  | 0.39        | 17.55  | 6.91  |
| Parker Dam State Park                  | PA    | 2005 | 73  | 0.16        | 19.65  | 3.23  |
| Presque Isle State Park                | PA    | 2005 | 50  | 0.24        | 12.01  | 2.88  |
| Prince Gallitzin State Park            | PA    | 2005 | 2   | 0.00        | 0.49   | 0.00  |
| Arcadia Management Area                | RI    | 2005 | 77  | 0.19        | 28.07  | 5.47  |
| Harbison State Forest                  | SC    | 2005 | 1   | 0.00        | 0.12   | 0.00  |
| Hunting Island State Park              | SC    | 2004 | 1   | 0.00        | 0.08   | 0.00  |
| Appomattox-Buckingham State Forest     | VA    | 2005 | 1   | 0.00        | 0.29   | 0.00  |
| Hemlock Overlook Regional Park         | VA    | 2006 | 51  | 0.14        | 7.38   | 1.01  |
| Pocahontas State Park                  | VA    | 2004 | 7   | 0.00        | 1.03   | 0.00  |
| Twin Lakes State Park                  | VA    | 2006 | 7   | 0.00        | 1.26   | 0.00  |
| Bomoseen State Park                    | VT    | 2006 | 16  | 0.00        | 2.39   | 0.00  |
| Big Eau Pleine Woods Natural Area      | WI    | 2006 | 506 | 0.18        | 101.29 | 18.62 |
| Black River State Forest               | WI    | 2005 | 12  | 0.25        | 3.98   | 0.99  |
| Brunet Island State Park               | WI    | 2005 | 138 | 0.22        | 27.80  | 6.04  |
| Copper Falls State Park                | WI    | 2006 | 19  | 0.32        | 5.51   | 1.74  |
| Council Grounds State Park             | WI    | 2005 | 9   | 0.33        | 2.42   | 0.81  |
| Hartman Creek State Park               | WI    | 2004 | 121 | 0.18        | 37.64  | 6.84  |
| Hoffman Hills SRA                      | WI    | 2004 | 101 | 0.21        | 17.88  | 3.72  |
| Kohler-Andrae State Park               | WI    | 2004 | 47  | 0.06        | 21.95  | 1.40  |
| Lake Wissota State Park                | WI    | 2006 | 19  | 0.26        | 5.59   | 1.47  |
| Mirror Lake State Park                 | WI    | 2006 | 208 | 0.11        | 41.69  | 4.61  |
| Mirror Lake State Park                 | WI    | 2005 | 140 | 0.10        | 28.18  | 2.82  |
| Mirror Lake State Park                 | WI    | 2004 | 23  | 0.22        | 11.09  | 2.41  |
| North Highlands/American Legion Forest | WI    | 2006 | 7   | 0.14        | 1.49   | 0.21  |
| Pattison State Park                    | WI    | 2006 | 2   | 0.00        | 0.84   | 0.00  |
| Rib Mountain State Park                | WI    | 2005 | 2   | 0.00        | 0.92   | 0.00  |
| Wildcat Mountain State Park            | WI    | 2005 | 116 | 0.16        | 25.70  | 4.21  |
| Willow River State Park                | WI    | 2006 | 47  | 0.19        | 13.99  | 2.68  |

\* N = sample size.

† Prevalence = proportion of *Borrelia burgdorferi*-infected *I. scapularis* nymphs.‡ DON = density of host-seeking *Ixodes scapularis* nymphs/1,000 m.§ DIN = density of infected host-seeking *Ixodes scapularis* nymphs/1,000 m.

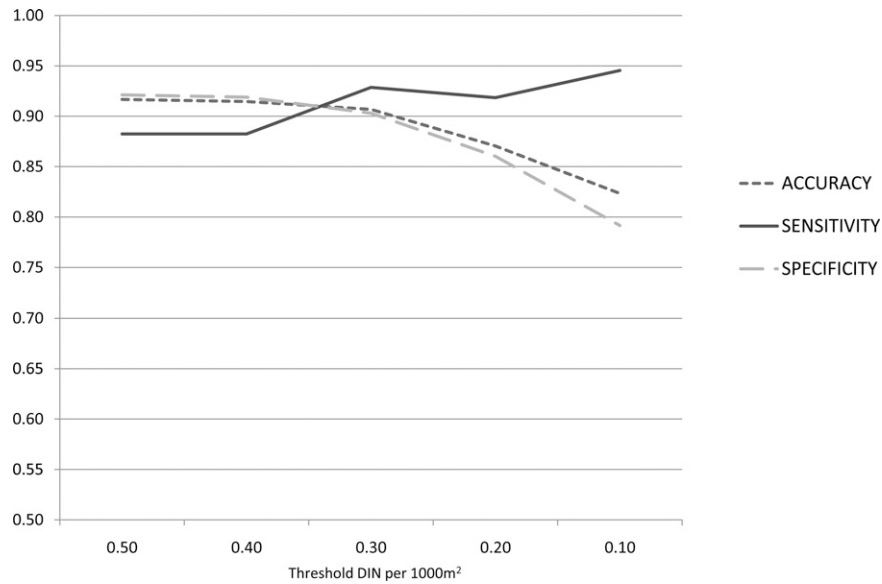

SUPPLEMENTARY FIGURE S1. Accuracy, sensitivity, and specificity of the risk model for different threshold densities of infected nymphs (DIN) per 1,000 m<sup>2</sup>. Selected threshold for the final model was 0.3 DIN per 1,000 m<sup>2</sup>; lower thresholds resulted in no increase in sensitivity, although resulted in reductions in specificity and accuracy.

## REFERENCES

1. Diuk-Wasser M, Vourc'h G, Cislo P, Gatewood Hoen A, Melton F, Hamer S, Rowland M, Hickling GJ, Tsao JI, Barbour AG, Kitron U, Piesman J, Fish D, 2010. Field and climate-based model for predicting the density of host-seeking nymphal *Ixodes scapularis*, an important vector of tick-borne disease agents in the eastern United States. *Glob Ecol Biogeogr* 19: 504–514.
2. Nemani R, Votava P, Michaelis A, White M, Melton F, Milesi C, Pierce L, Golden K, Hashimoto H, Ichii K, Johnson L, Jolly M, Myneni R, Tague C, Coughlan J, Running S, 2007. Remote sensing methodologies for ecosystem management. Aswathanarayana U, ed. *Food and Water Security*. Oxford, UK: Taylor & Francis Book Series, 1–19.
3. Hay SI, Tatem AJ, Graham AJ, Goetz SJ, Rogers DJ, 2006. *Global Environmental Data for Mapping Infectious Disease Distribution: Advances in Parasitology. Volume 62*. San Diego, CA: Elsevier Academic Press Inc., 37–77.
4. United States Department of Agriculture, 2006. U.S. *General Soil Map (STATSGO2)*. Available at: <http://soils.usda.gov/survey/geography/statsgo/>. Accessed December 1, 2011.
5. Rogers DJ, Randolph SE, 2003. Studying the global distribution of infectious diseases using GIS and RS. *Nat Rev Microbiol* 1: 231–237.
